# Supplementary material for: Computational analysis of TP53 mutational landscape unveils key prognostic signatures and distinct pathobiological pathways in head and neck squamous cell cancer
Source: PubMed Central journal article supplement (PMC7553957; doi:10.1038/s41416-020-0984-6), 2020-07-20

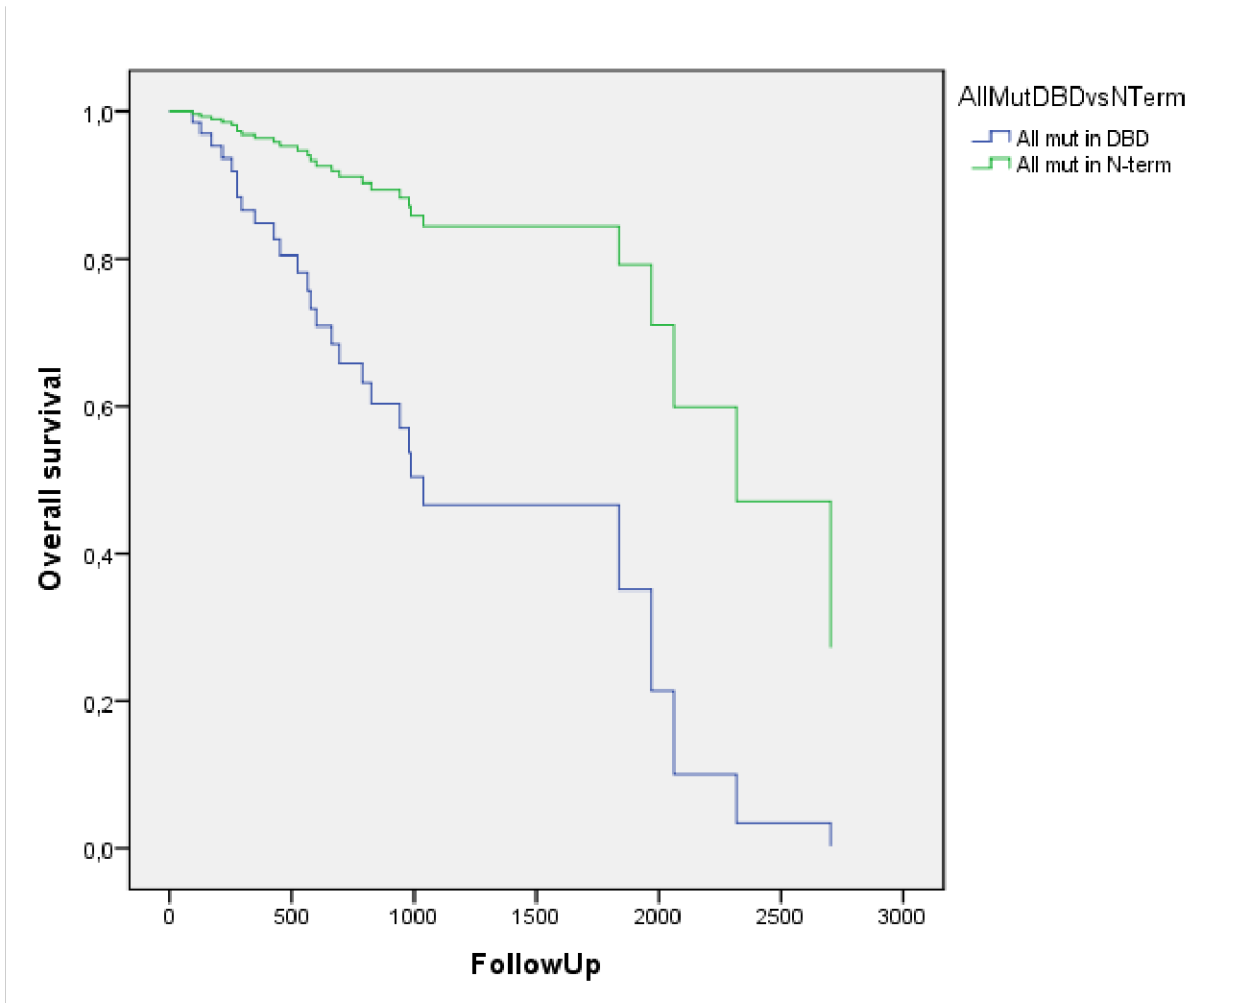

Supplemental material Figure 1: Multivariate Overall survival in larynx for TP53 mutations in DBD versus N-term.

| Clinic-pathological covariates | Sig.  | Hazard Ratio | 95% C.I.    |             |
|--------------------------------|-------|--------------|-------------|-------------|
|                                |       |              | Lower limit | Upper limit |
| Age                            | 0,807 | 0,993        | 0,941       | 1,048       |
| Stage                          | 0,622 | 1,155        | 0,652       | 2,046       |
| Grading                        | 0,741 | 0,868        | 0,375       | 2,007       |
| Gender                         | 0,001 | 4,035        | 1,756       | 9,272       |
| DBD vs N-Term                  | 0,050 | 0,223        | 0,050       | 0,998       |

Supplemental material Figure 1: Multivariate Overall survival in larynx for TP53 mutations in DBD versus N-term.

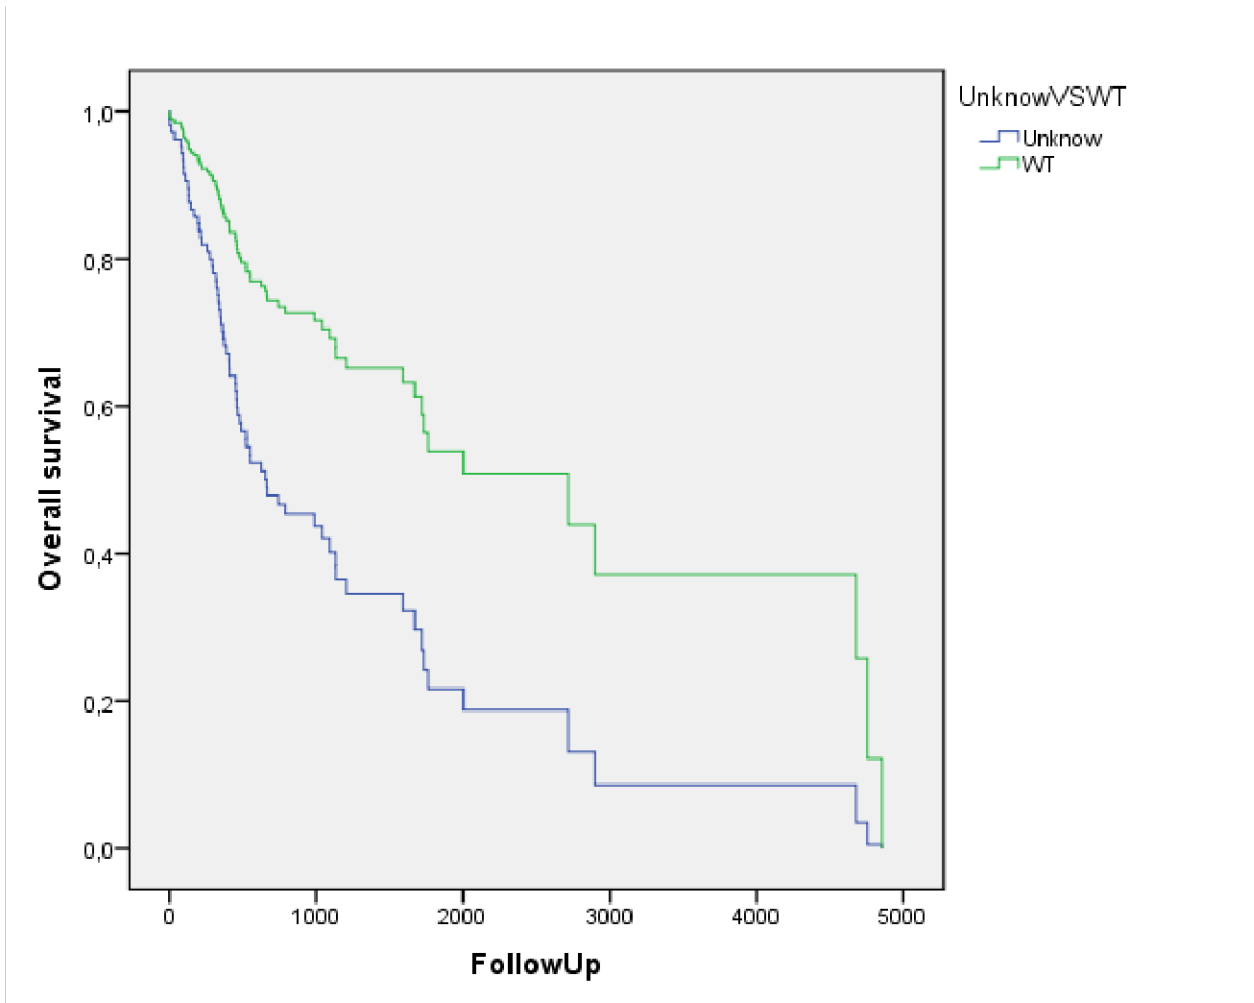

Supplemental material Figure 2: Multivariate Overall survival in HNSCC for TP53 mutations in unknown secondary structure versus wild-type.

| Clinic-pathological covariates | Sig.  | Hazard Ratio | 95% C.I.    |             |
|--------------------------------|-------|--------------|-------------|-------------|
|                                |       |              | Lower limit | Upper limit |
| Age                            | 0,086 | 1,021        | 0,997       | 1,046       |
| Stage                          | 0,659 | 1,061        | 0,815       | 1,383       |
| Grading                        | 0,563 | 1,120        | 0,764       | 1,641       |
| Gender                         | 0,500 | 0,832        | 0,487       | 1,421       |
| Unknown vs WT                  | 0,000 | 2,476        | 1,525       | 4,019       |

Supplemental material Figure 2: Multivariate Overall survival in HNSCC for TP53 mutations in unknown secondary structure versus wild-type.



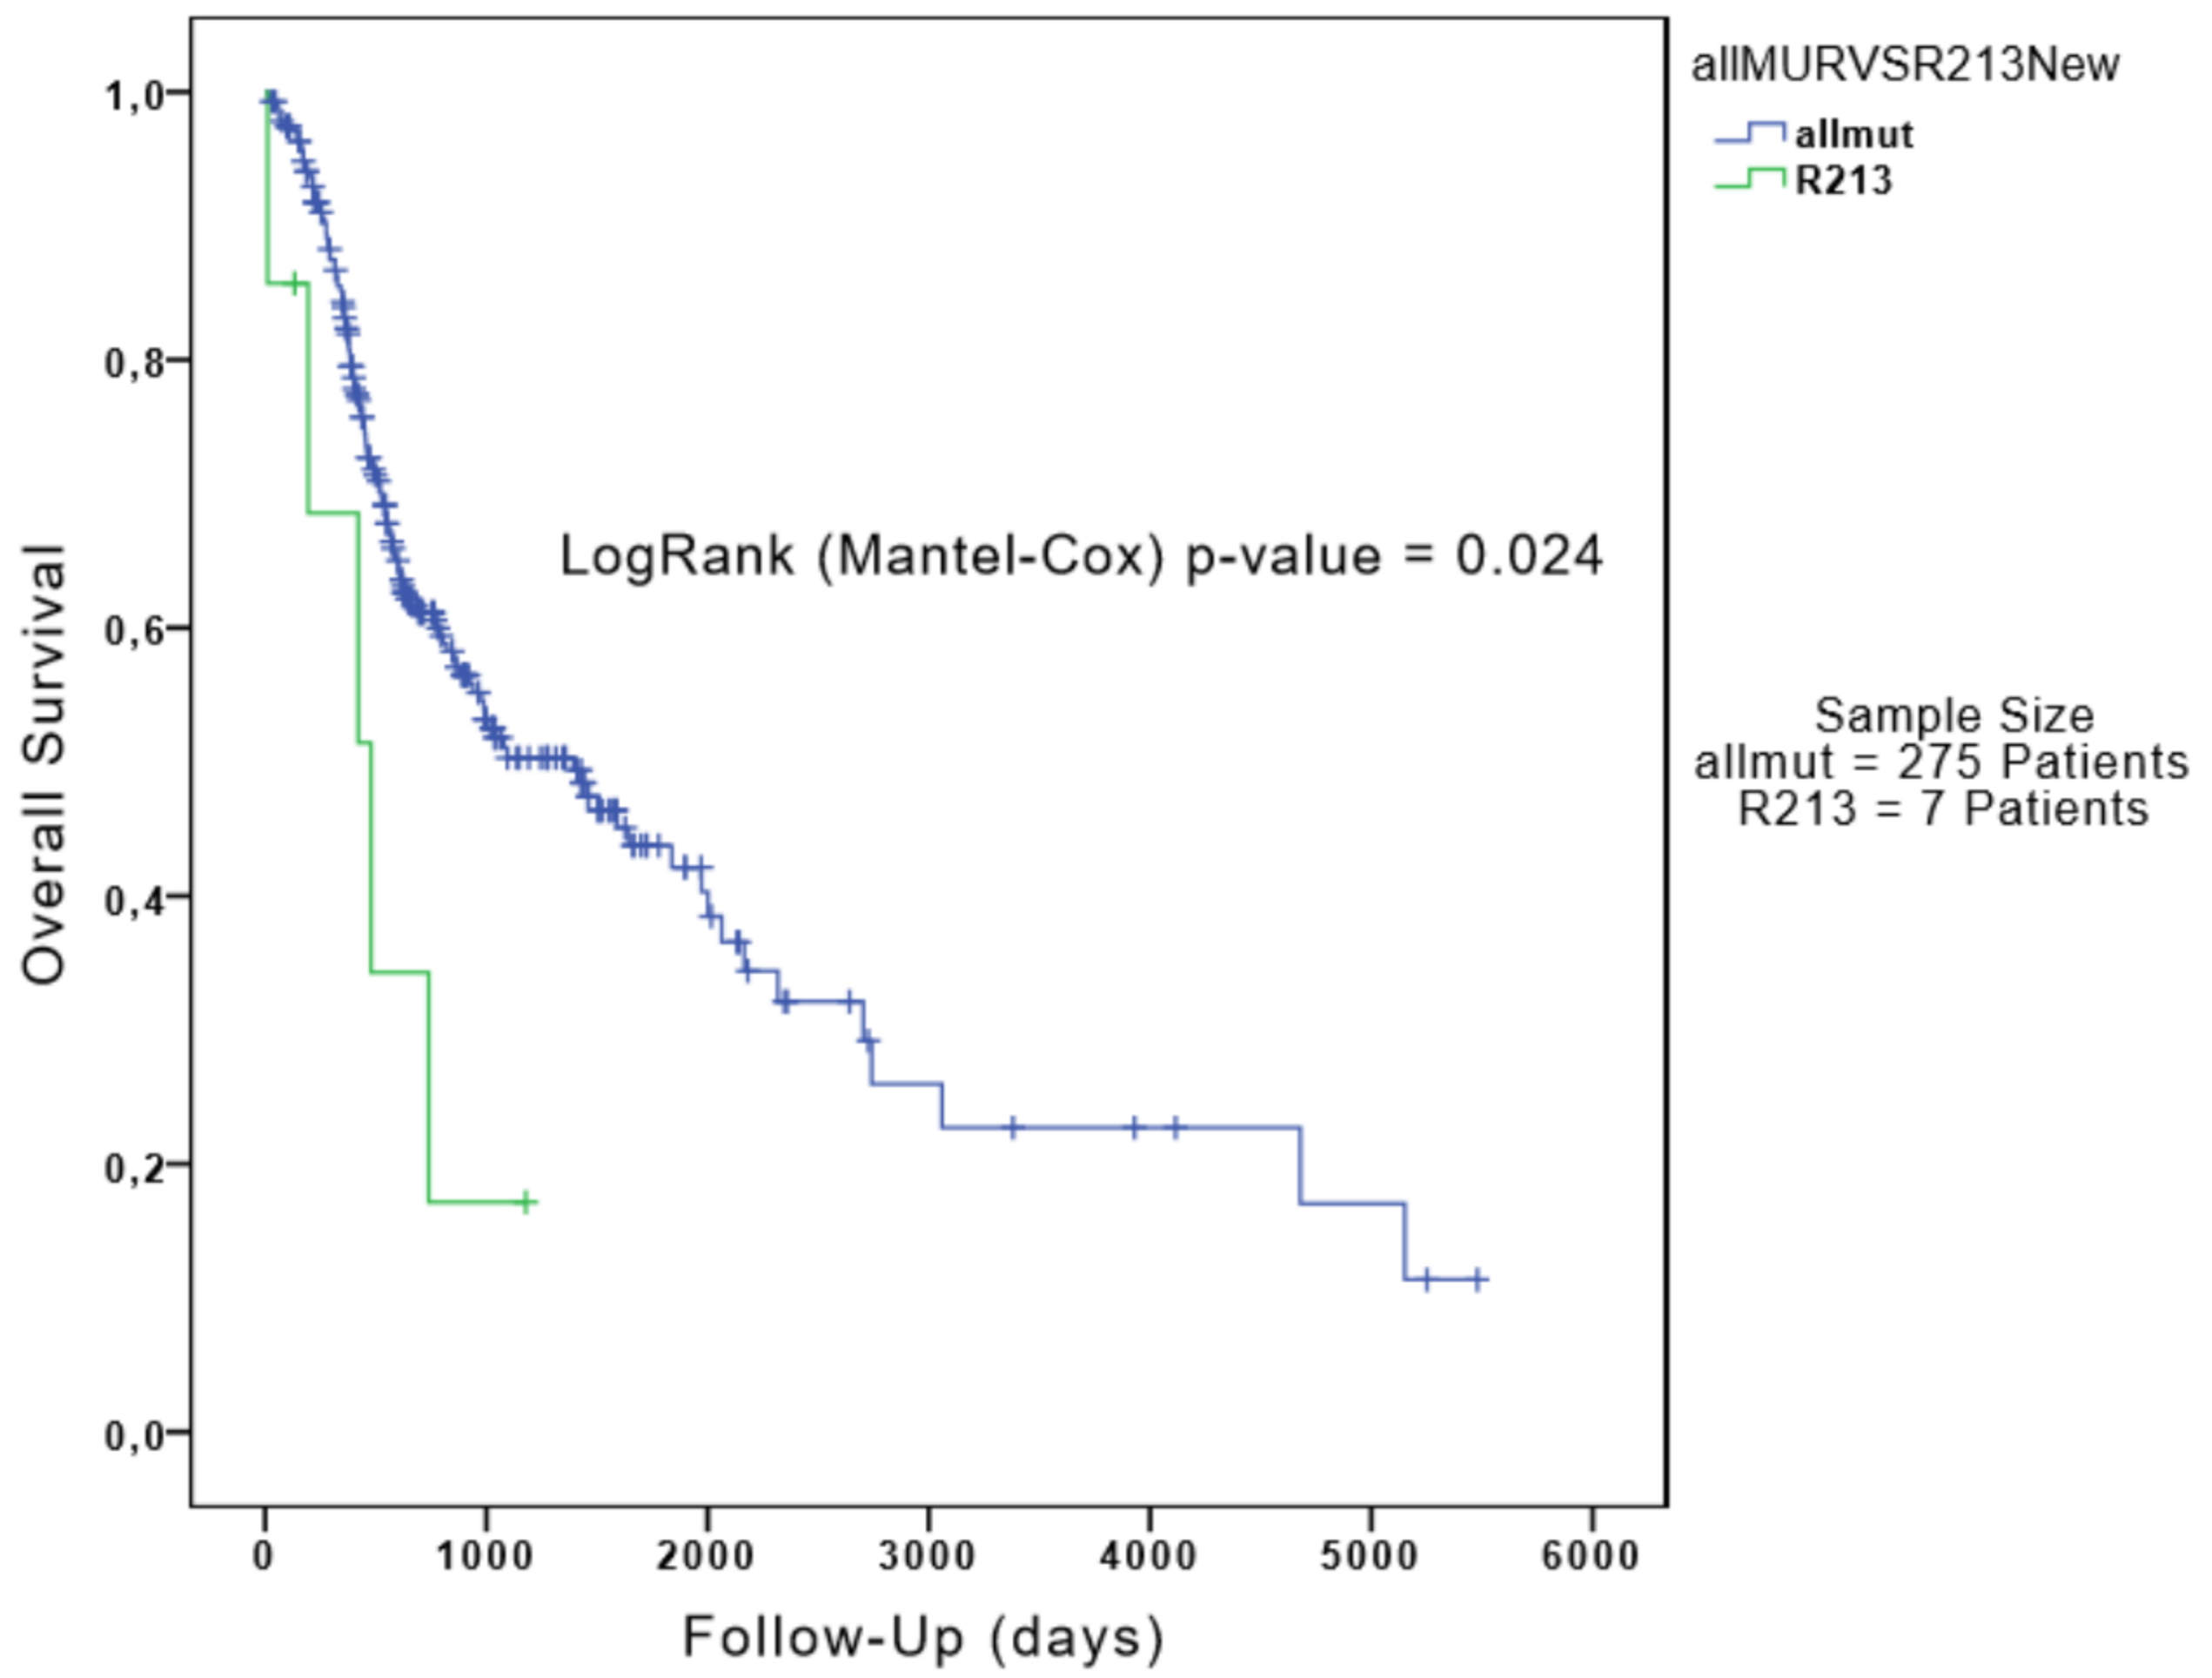

Supplemental material Figure 3: Univariate analysis for overall survival according to R213 MUT.

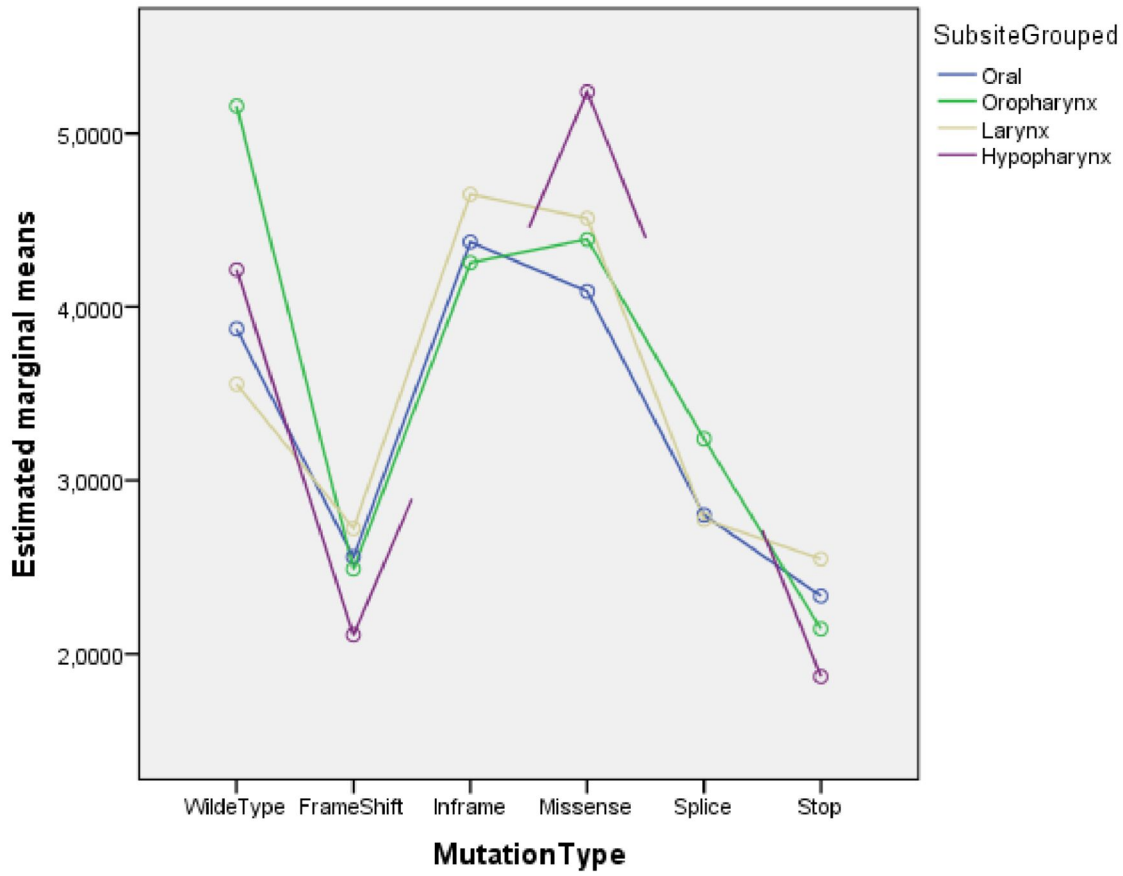

Supplemental material Figure 4: Two-way ANOVA showing the differential mRNA expression according to the mutational TP53 status and anatomical subsite.



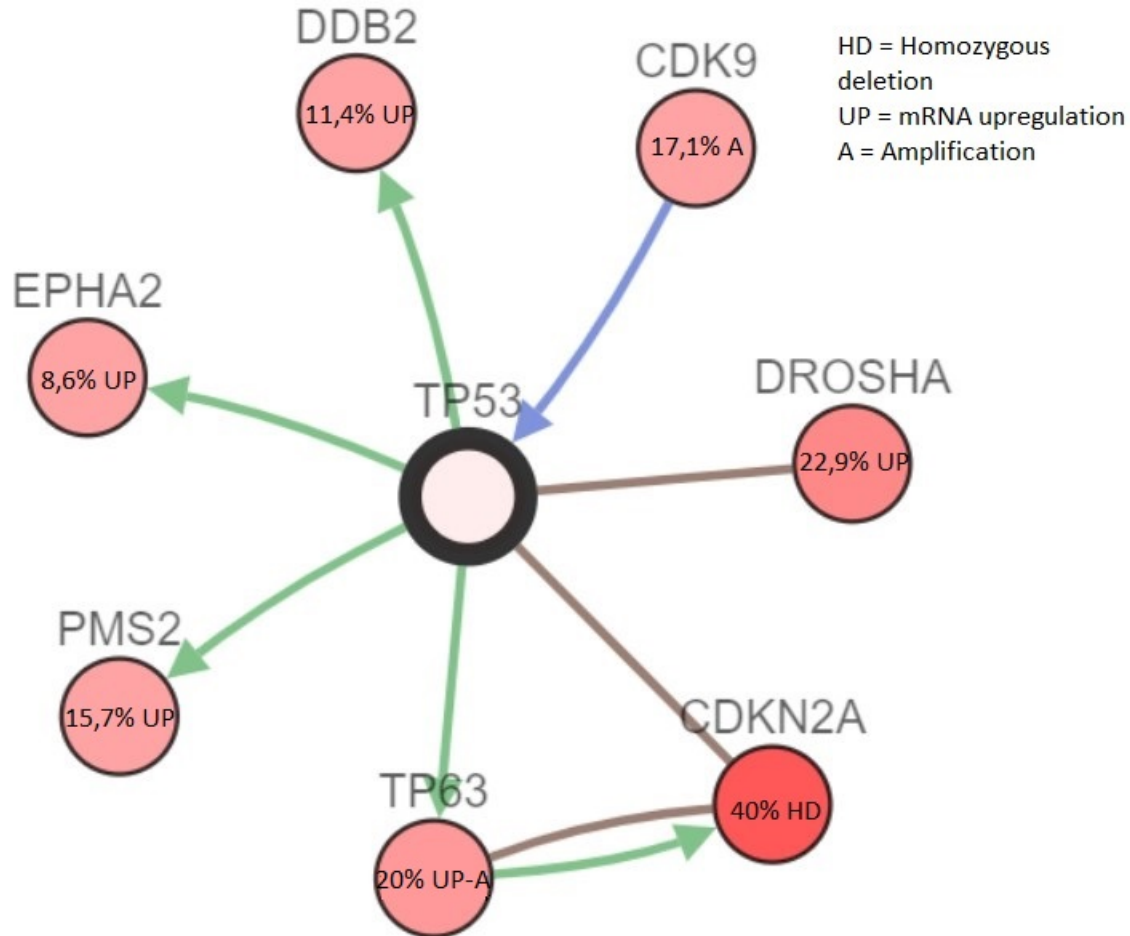

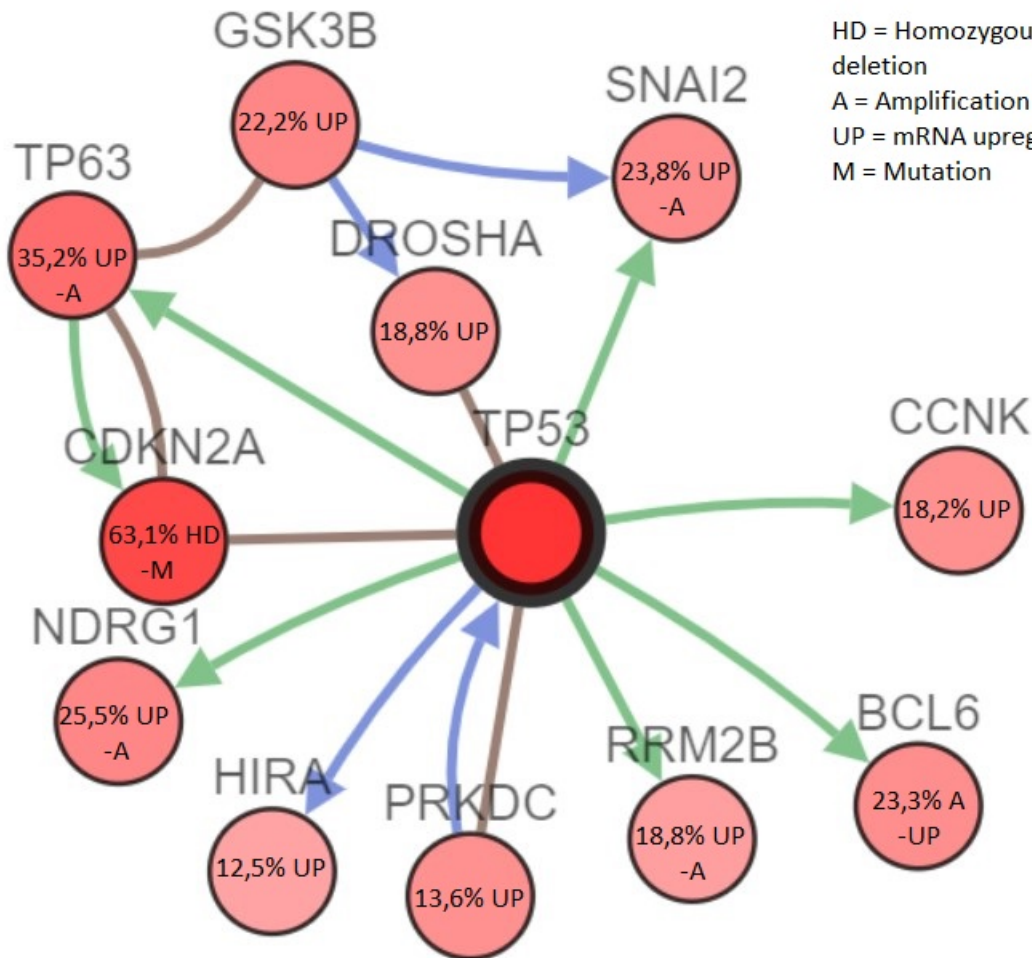

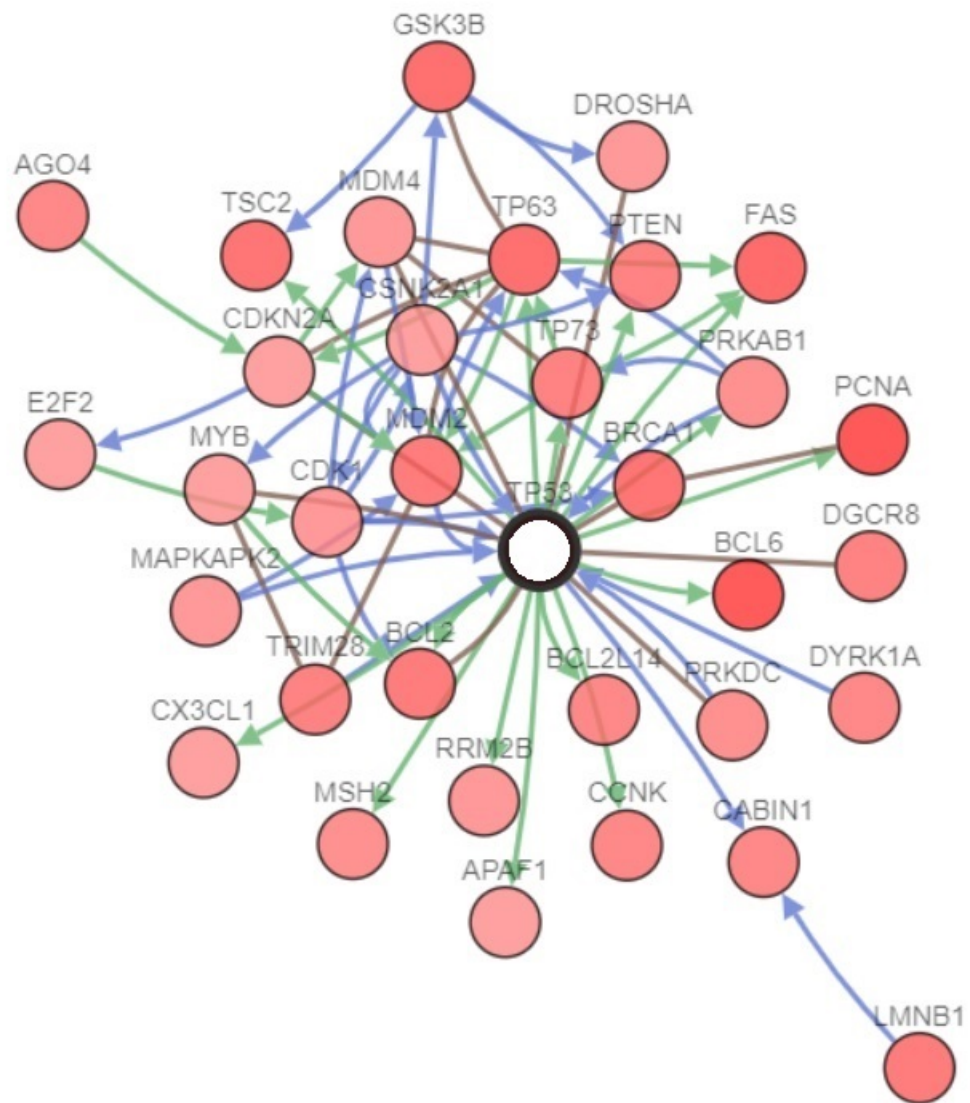

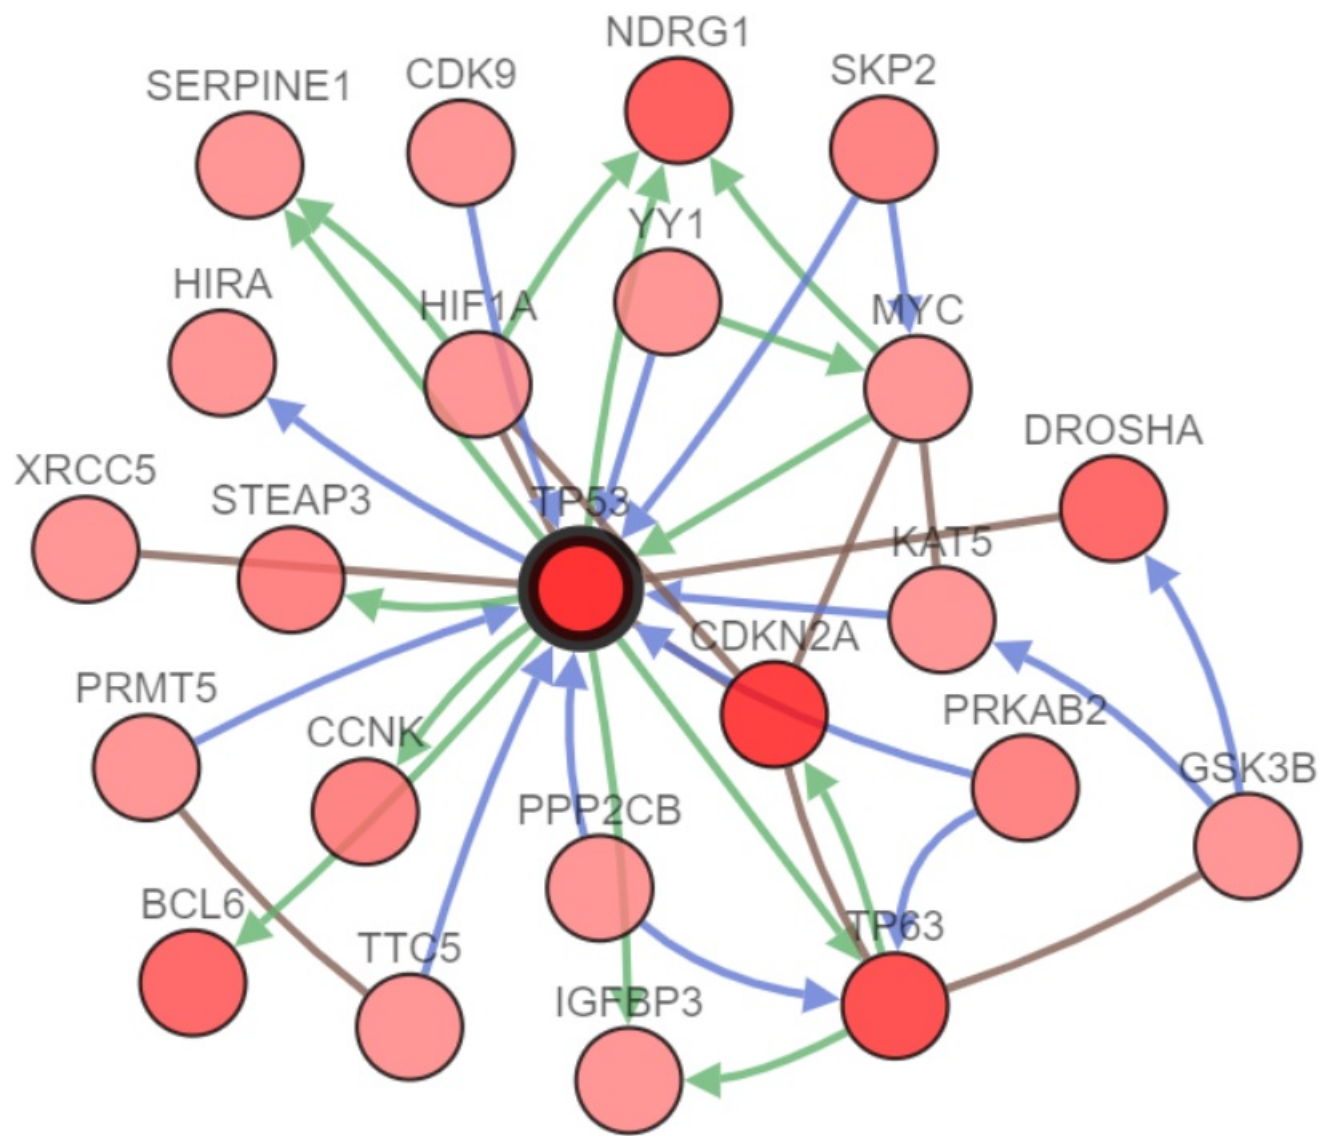



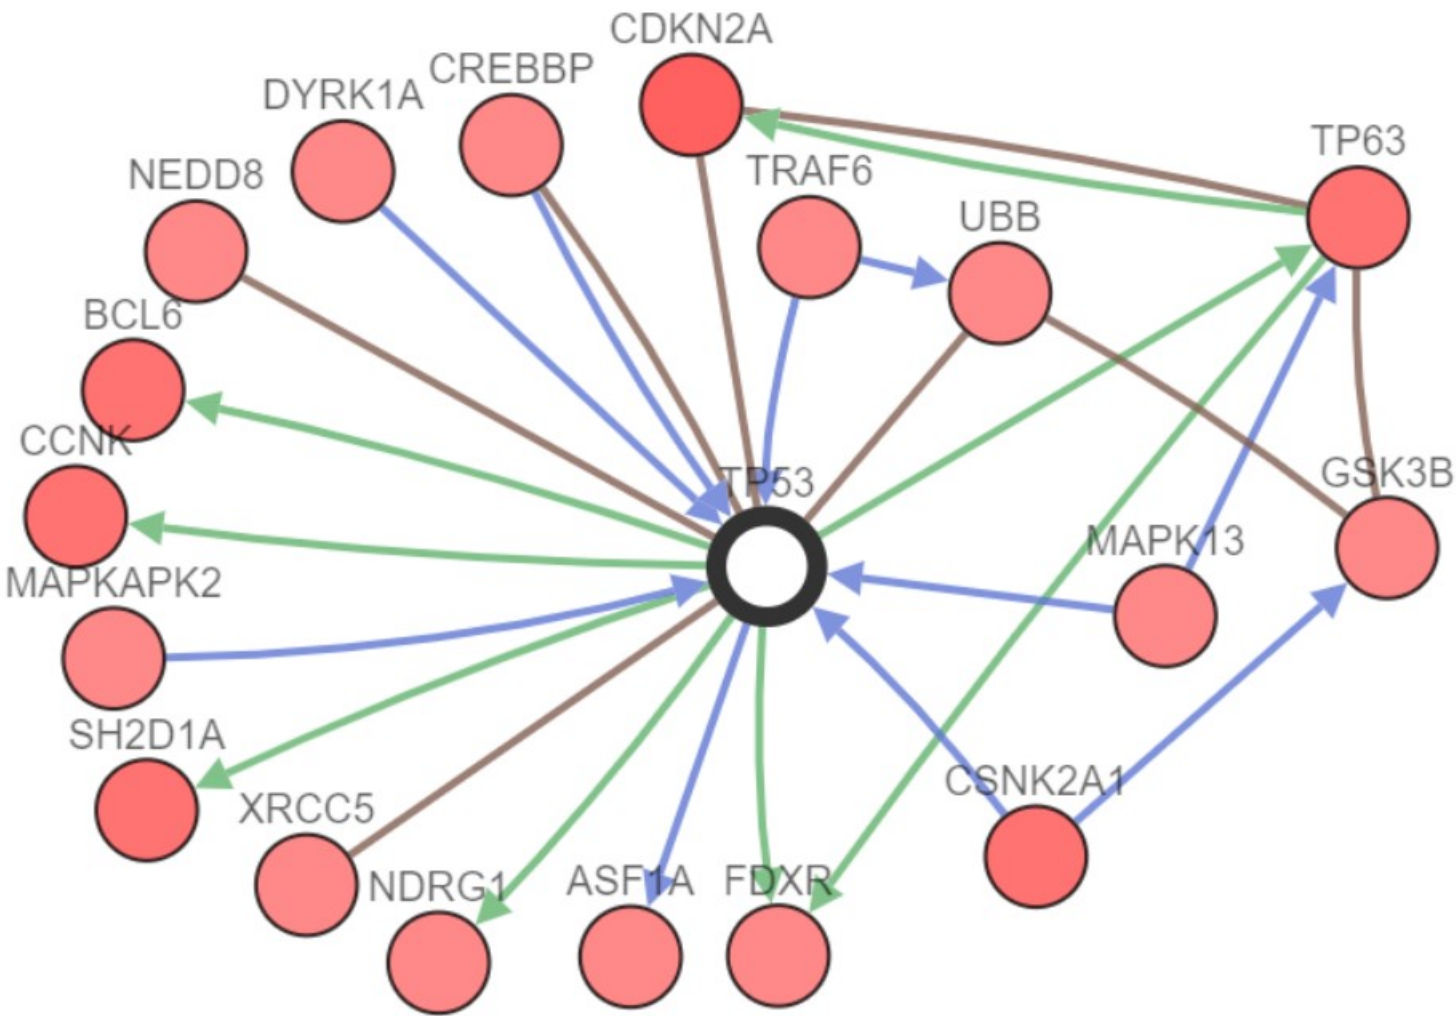



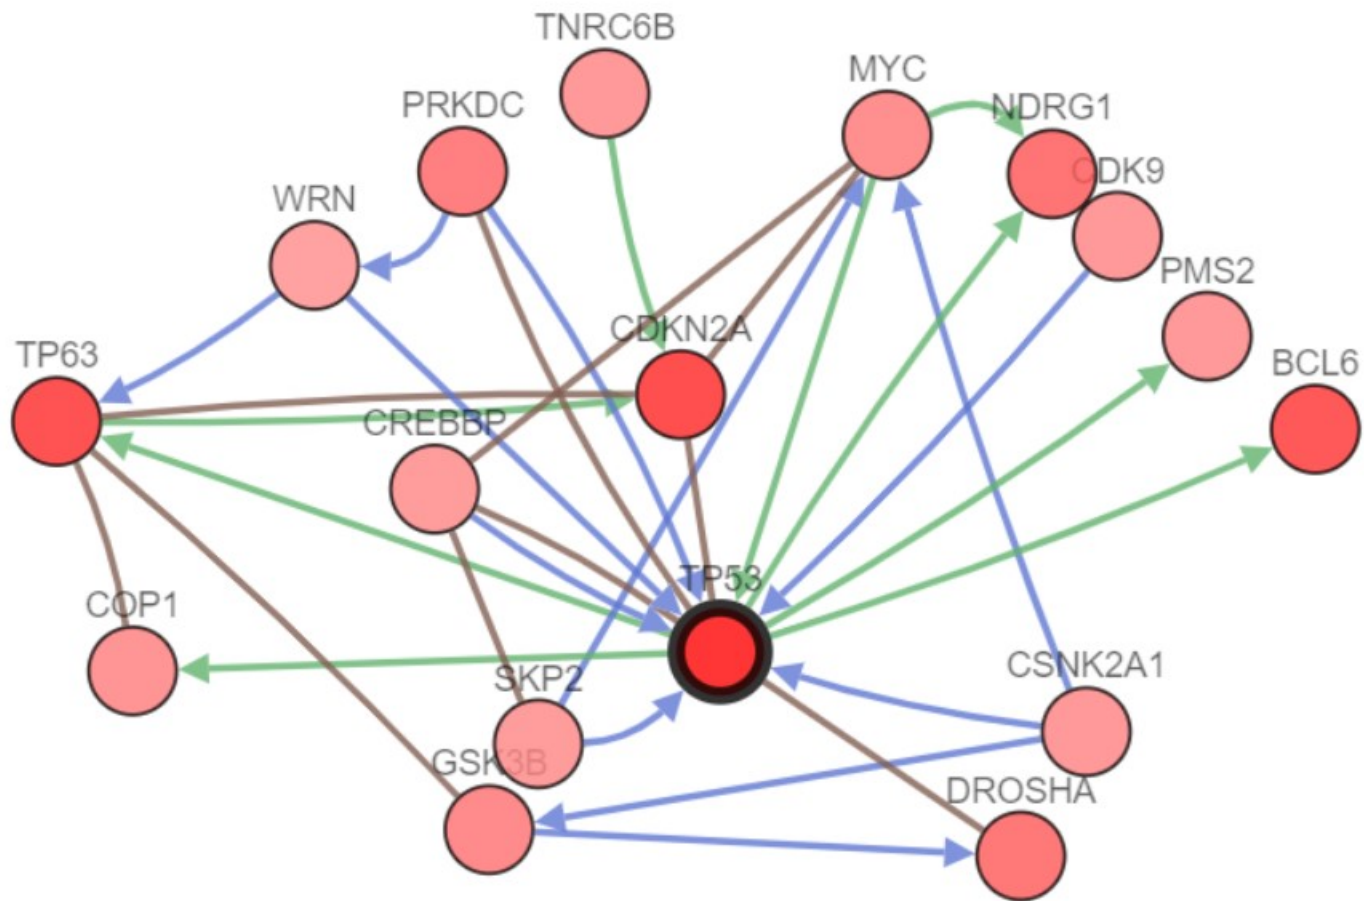

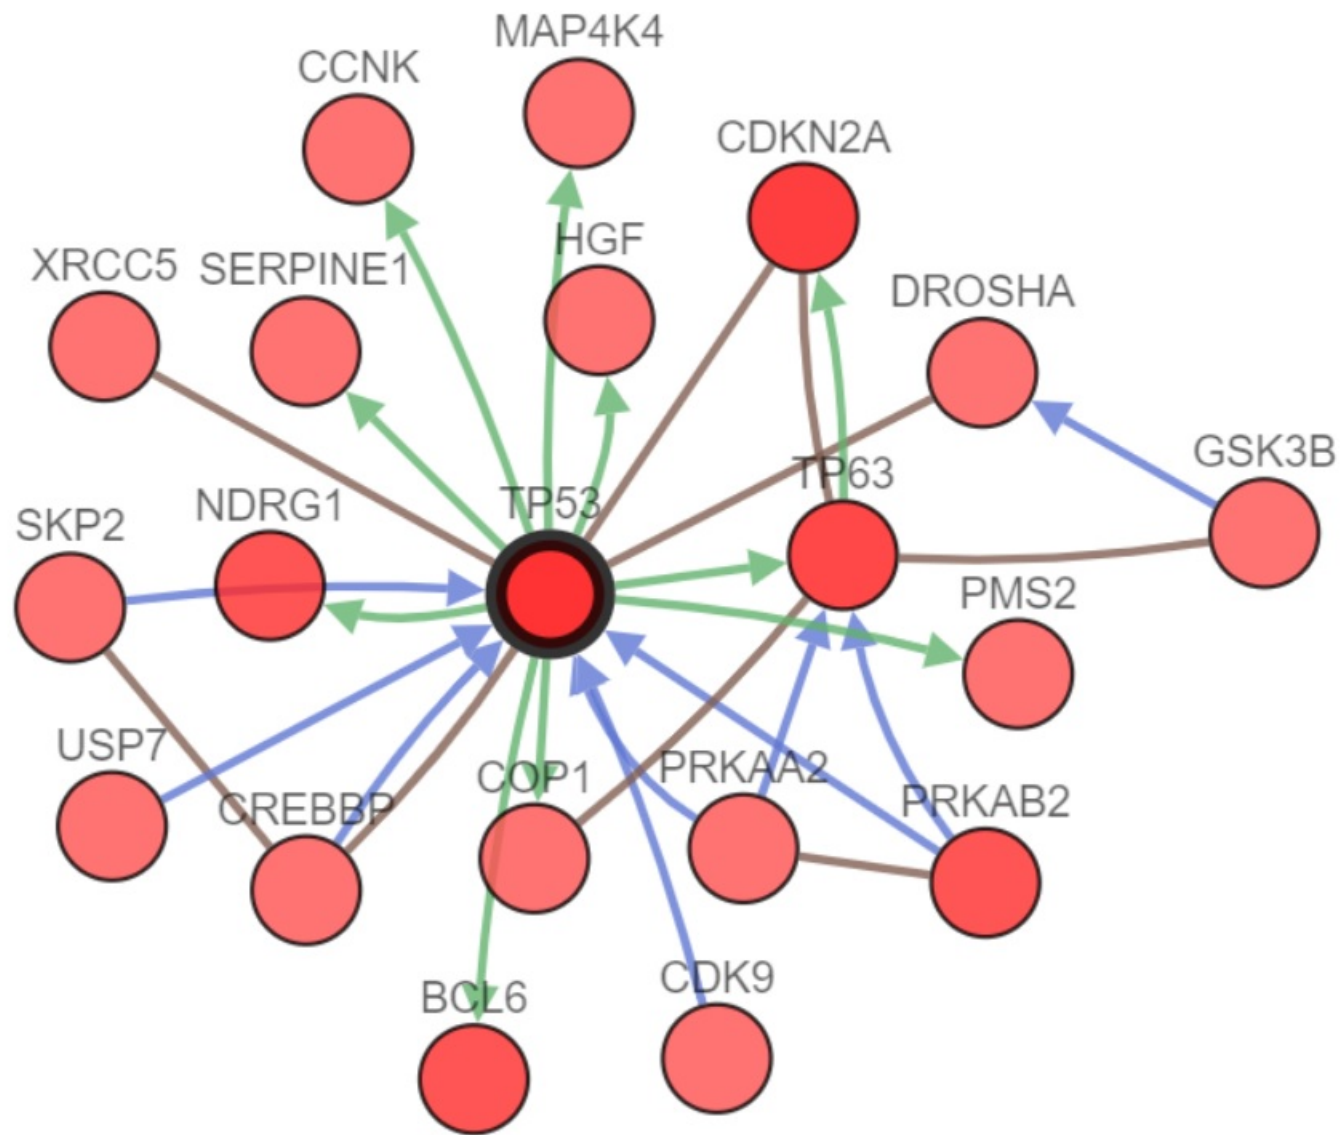

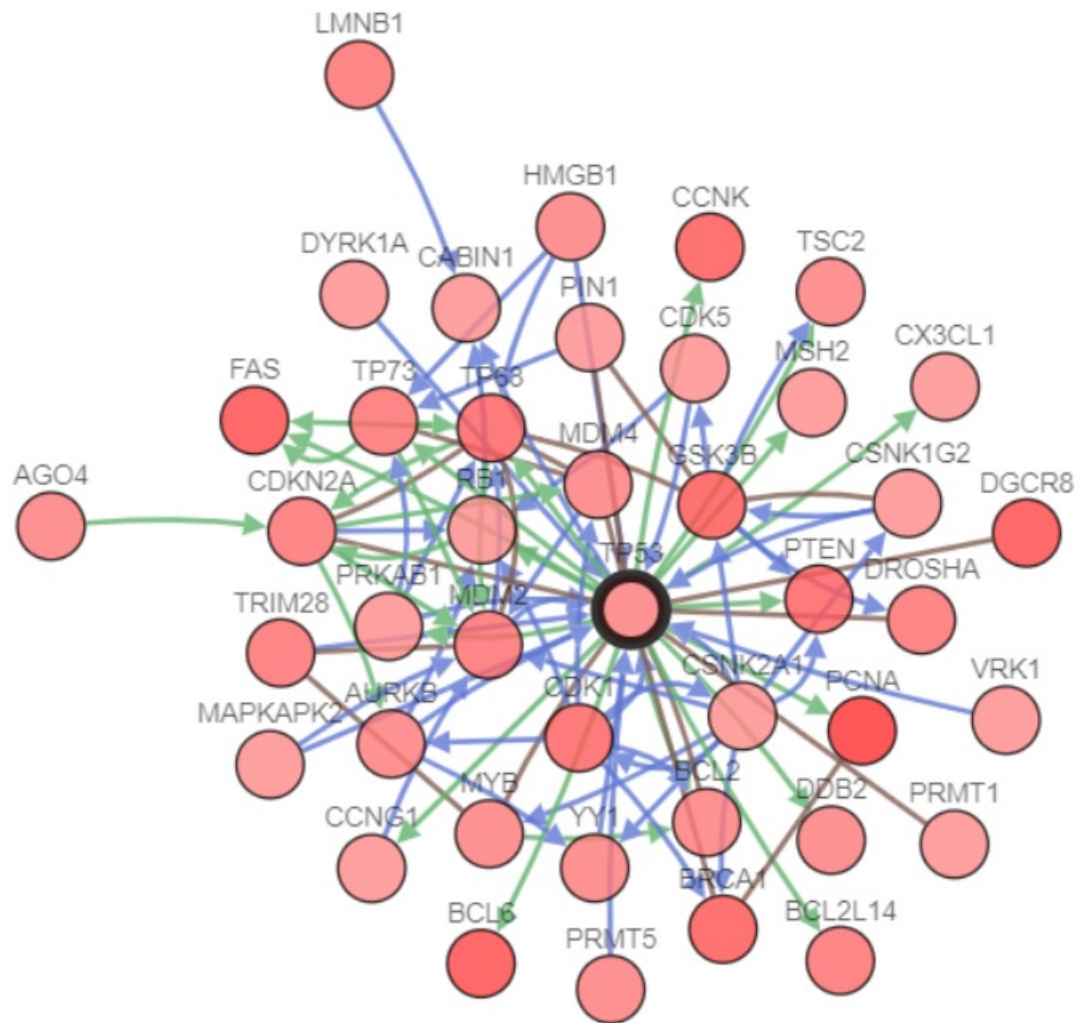

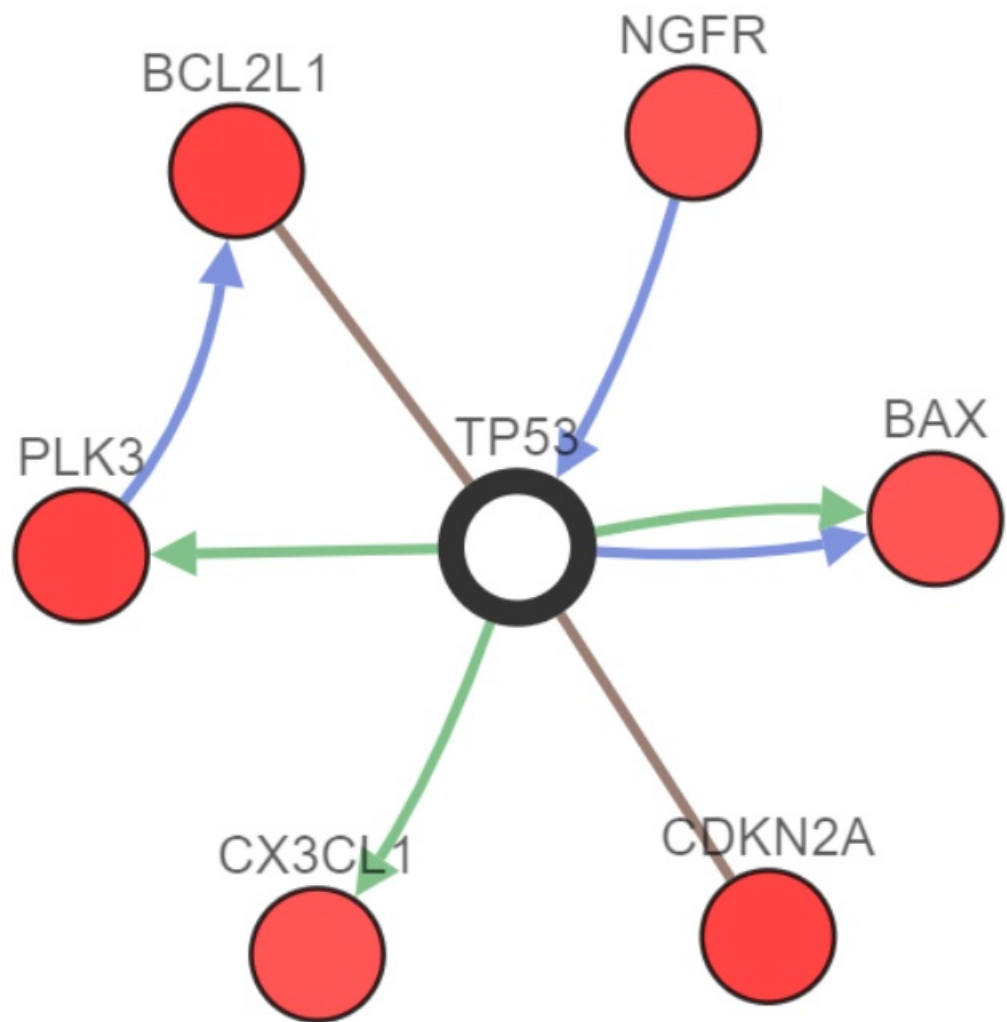

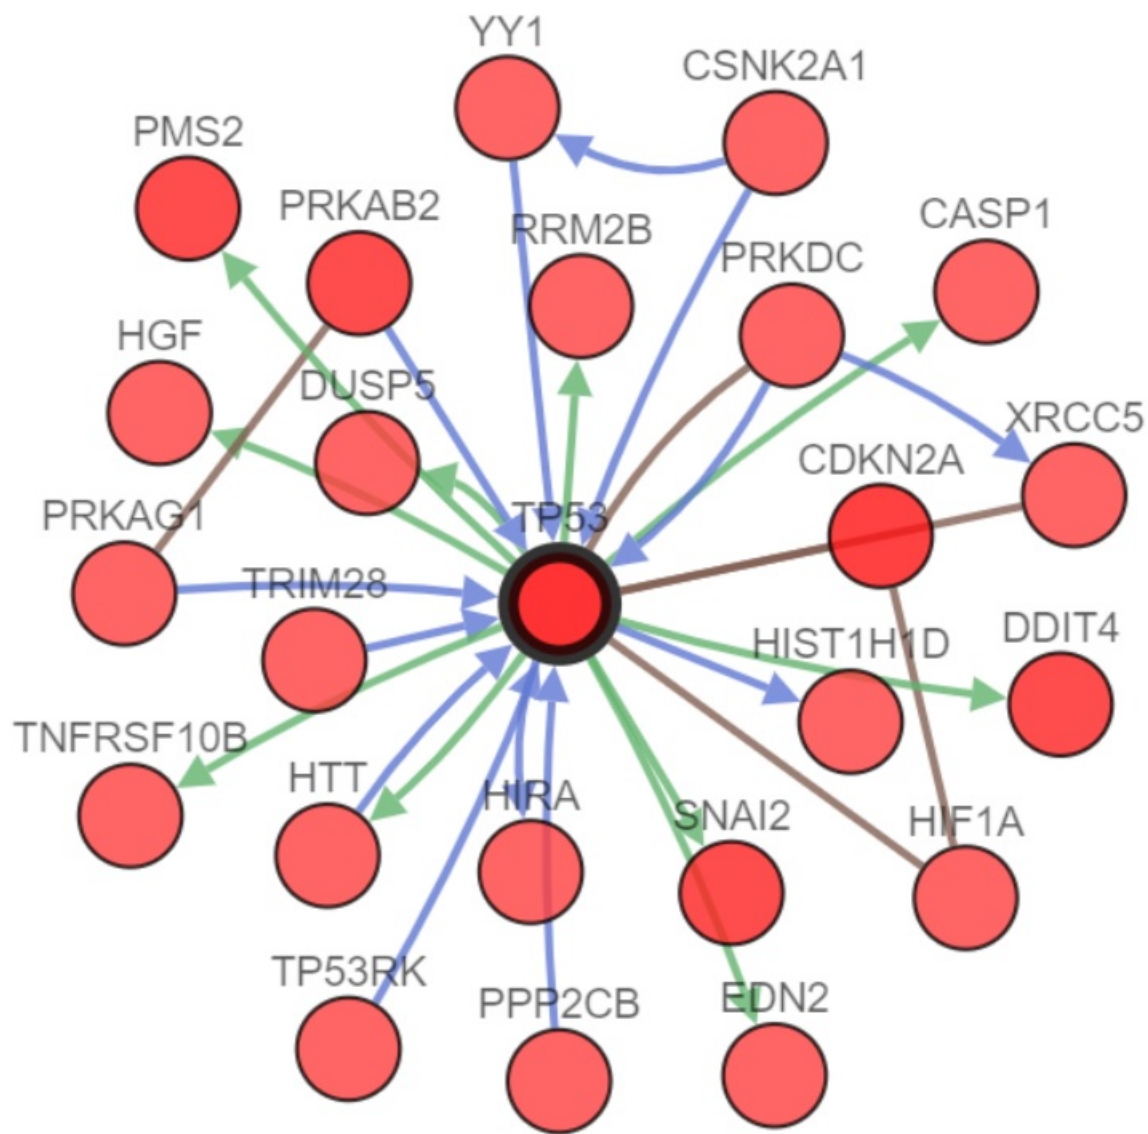

Supplement: 41416_2020_984_MOESM2_ESM.pdf [file 41416_2020_984_MOESM2_ESM.pdf]
